# Supplementary material for: The Single-Nucleotide Polymorphism (SNP) Validity to Detect Omicron Variants
Source: Hindawi journal article supplement (doi:10.1155/2023/6618710), 2023-09-07

DATA PENELITI

|                           |   |                                                                                                                                                                                                                      |
|---------------------------|---|----------------------------------------------------------------------------------------------------------------------------------------------------------------------------------------------------------------------|
| NO. REGISTRASI            | : | 03.22.85                                                                                                                                                                                                             |
| NO. PERSETUJUAN ETIK      | : | LB.02.01/X.6.5/85/2022                                                                                                                                                                                               |
| NAMA PENELITI UTAMA       | : | Luhung Budiaillmiawan, dr.,SpPK(K)                                                                                                                                                                                   |
| NPM/NIP/NIDK              | : | 198004042009021003                                                                                                                                                                                                   |
| JUDUL PENELITIAN          | : | Uji Diagnostik Pemeriksaan <i>Polymerase Chain Reaction</i> (PCR) SARS-CoV-2 Varian Omicron Menggunakan <i>Single Nucleotide Polymorphisms</i> (SNP) Terhadap <i>Whole Genome Sequencing</i> (WGS) Sebagai Baku Emas |
| INSTITUSI PENGUSUL        | : | Perhimpunan Dokter Spesialis Patologi Klinik dan Kedokteran Laboratorium Indonesia (PDS PatKLin)                                                                                                                     |
| JENJANG / KLASIFIKASI     | : | 13                                                                                                                                                                                                                   |
| JENIS PENELITIAN          | : | <input checked="" type="checkbox"/> Uji Klinis <input type="checkbox"/> Non Uji Klinis                                                                                                                               |
| TANGGAL MENDAFTAR         | : | 16 Desember 2021                                                                                                                                                                                                     |
| PERPANJANGAN / AMANDEMEN  |   | -                                                                                                                                                                                                                    |
| TANGGAL VERIFIKASI        | : | 14 Februari 2022                                                                                                                                                                                                     |
| KEPUTUSAN VERIFIKASI      | : | <input type="checkbox"/> Disetujui<br><input checked="" type="checkbox"/> Disetujui dengan perbaikan kecil<br><input type="checkbox"/> Perlu Perombakan mendasar pada protokol<br><input type="checkbox"/> Ditolak   |
| TANGGAL TERIMA PERBAIKAN  | : |                                                                                                                                                                                                                      |
| KEPUTUSAN AKHIR           | : | <b>DISETUJUI</b>                                                                                                                                                                                                     |
| TANGGAL TANDA TANGAN      | : | 15 Maret 2022                                                                                                                                                                                                        |
| KOTA PENANDATANGANAN      | : | Bandung                                                                                                                                                                                                              |
| NAMA YANG BERTANDA TANGAN | : | Dr. Ina Rosalina, dr., Sp.A(K)., M.Kes., MH.Kes.                                                                                                                                                                     |
| SEKRETARIS/SEKRETARIAT    | : | <input checked="" type="checkbox"/> NNH <input checked="" type="checkbox"/> RZL <input checked="" type="checkbox"/> AHH                                                                                              |

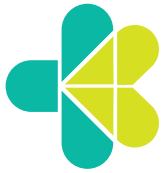

# KEMENTERIAN KESEHATAN REPUBLIK INDONESIA

## DIREKTORAT JENDERAL PELAYANAN KESEHATAN

RSUP Dr. HASAN SADIKIN BANDUNG

Jalan Pasteur No. 38, Bandung 40161

Telepon : (022) 2034953, 2034954 (*hunting*) Faksimile : (022) 2032216, 2032533

Laman : [www.rshs.or.id](http://www.rshs.or.id) Pos-el : [rshs@rshs.web.id](mailto:rshs@rshs.web.id)

SMS hotline : 08112335555, Contact Center : 022 - 2551111, Reservasi Online : [reservasi.rshs.or.id](http://reservasi.rshs.or.id), facebook : [/rshsbdg](https://www.facebook.com/rshsbdg), twitter@rshsbdg

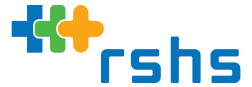

No. Reg. 03.22.85

### **PERSETUJUAN ETIK ETHICAL APPROVAL**

NOMOR : LB.02.01/X.6.5/85/2022

Komite Etik Penelitian RSUP Dr. Hasan Sadikin Bandung, dalam upaya melindungi hak asasi dan kesejahteraan subjek penelitian serta menjamin bahwa penelitian yang menggunakan formulir survei/registrasi/surveilans/Bahan Biologi Tersimpan dan non klinis lainnya berjalan dengan memperhatikan implikasi etik, sosial dan non klinis lainnya yang berlaku, telah mengkaji dengan teliti proposal penelitian berjudul :

*The Research Ethics Committee of Dr. Hasan Sadikin General Hospital Bandung, in order to protect the right and welfare of the research subject and to guaranty that the research using survey questionnaire/registry/surveillance/archived biological materials/other non vlinical materials, will carried out according to ethical, legal social implications and other applicable regulations, has been thoughtly reviewed the proposal entitled:*

#### **“Uji Diagnostik Pemeriksaan *Polymerase Chain Reaction (PCR)* SARS-CoV-2 Varian Omicron Menggunakan *Single Nucleotide Polymorphisms (SNP)* Terhadap *Whole Genome Sequencing (WGS)* Sebagai Baku Emas”**

Nama Peneliti Utama : Luhung Budiailmiawan, dr.,SpPK(K)  
*Principal Researcher*

Pembimbing/Peneliti Lain : Basti Andriyoko, dr., SpPK(K)  
*Supervisor/Other Researcher*  
Louisa Markus, dr., SpPK  
Prof. Dr. dr. Aryati, MS, SpPK(K)  
Prof. Dr. dr. Ida Parwati, SpPK(K).PhD  
Dr. dr. Lia Gardenia Partakusuma, SpPK(K), MM, MARS

Nama Institusi : Perhimpunan Dokter Spesialis Patologi Klinik dan Kedokteran  
*Institution* Laboratorium Indonesia (PDS PatKlin)

proposal tersebut dapat disetujui pelaksanaannya.  
*hereby declare that the proposal approved*

- Penelitian dapat dilaksanakan setelah mendapatkan Surat Izin Penelitian dari direktur atau pejabat terkait RSUP Dr. Hasan Sadikin Bandung atau institusi dimana penelitian dilaksanakan.**
- Pada akhir penelitian laporan pelaksanaan penelitian harus diserahkan kepada Komite Etik Penelitian RSUP Dr. Hasan Sadikin Bandung.  
Jika ada perubahan protokol dan/atau perpanjangan penelitian, harus mengajukan Kembali permohonan kajian etik penelitian (amandemen protokol).
- Research can be carried out after obtaining a research permit from director or related officials Dr. Hasan Sadikin General Hospital Bandung or the institution where the research is carried out.**
- At the end of research, a report of reseach implementation must be submitted to Health Research Ethics Committee of Dr. Hasan Sadikin General Hospital Bandung.  
*If there's a change of protocol and/or a research extension, the principal investigator is required to resubmit the protocol for approval (protocol amendment).*

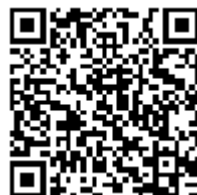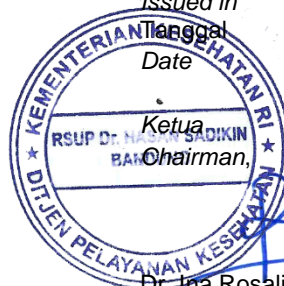

Ditetapkan di : Bandung  
*Issued in*  
Tanggal : 15 Maret 2022  
*Date*

Ketua  
*Chairman,*  
Dr. Ina Rosalina, dr., Sp.A(K), M.Kes., MH.Kes.  
NIP. 196010251987032001

**\*Ethical approval berlaku satu tahun dari tanggal persetujuan**

**\*\*Peneliti berkewajiban :**

- Menjaga kerahasiaan identitas subjek penelitian  
*Keep the subject's confidential*
- Memberitahukan status penelitian apabila :
  - Setelah masa berlakunya keterangan lolos kaji etik, penelitian masih belum selesai, dalam hal ini *ethical approval* dan surat izin penelitian harus diperpanjang
  - Penelitian berhenti ditengah jalan  
*Notify of the research status:*
    - There after of period of passing Ethical Approval, a research still not completed, this matter ethical approval and research permit have to be extended*
    - Study ended midway*
- Melaporkan kejadian serius yang tidak diinginkan (*serious adverse events*)  
*Report a undersirable serious event (serious adverse events)*
- Melaporkan pelaksanaan penelitian secara berkala  
*Report a study on periodically*

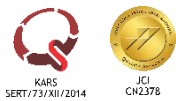

Supplement: f1 [file 6618710.f1.zip]
