# Supplementary material for: The Single-Nucleotide Polymorphism (SNP) Validity to Detect Omicron Variants
Source: Hindawi journal article supplement (doi:10.1155/2023/6618710), 2023-09-07
Supplement: f1 [file 6618710.f1.zip]

| No | Sample | WGS Results      | Sex       | CT   | Age   | SNP Genotyping result | SGTF |
|----|--------|------------------|-----------|------|-------|-----------------------|------|
| 1  | SNP01  | Omicron BA.5.2   | Perempuan | 29.8 | 32    | Negatif Q493R         | Pos  |
| 2  | SNP02  | Omicron BA.5.2   | Perempuan | 27.9 | 43    | Negatif Q493R         | Pos  |
| 3  | SNP04  | Omicron BA.5.2.1 | Laki-laki | 16.0 | 31    | Negatif Q493R         | Pos  |
| 4  | SNP05  | Omicron BA.5.2.1 | Perempuan | 27.3 | 19    | Negatif Q493R         | Pos  |
| 5  | SNP06  | Omicron BA.5.2.1 | Perempuan | 22.4 | 26    | Negatif Q493R         | Pos  |
| 6  | SNP07  | Omicron BA.5.6   | Perempuan | 26.8 | 36    | Negatif Q493R         | Pos  |
| 7  | SNP08  | Omicron BA.5.2   | Perempuan | 25.4 | 70    | Negatif Q493R         | Pos  |
| 8  | SNP09  | Omicron BA.5.2   | Laki-laki | 26.8 | 71    | Negatif Q493R         | Pos  |
| 9  | SNP010 | Omicron BA.5.2   | Laki-laki | 26.3 | 44    | Negatif Q493R         | Pos  |
| 10 | SNP011 | Omicron BA.5.2   | Perempuan | 28.3 | 61    | Negatif Q493R         | Pos  |
| 11 | SNP012 | Omicron BA.5.2   | Perempuan | 26.1 | 25    | Negatif Q493R         | Pos  |
| 12 | SNP013 | Omicron BA.5.2   | Perempuan | 28.7 | 23    | Negatif Q493R         | Pos  |
| 13 | SNP014 | Omicron BA.5.2.1 | Perempuan | 13.4 | 63    | Negatif Q493R         | Pos  |
| 14 | SNP015 | Omicron BA.5.2.1 | Perempuan | 13.5 | 66    | Negatif Q493R         | Pos  |
| 15 | SNP016 | Omicron BA.5.2   | Perempuan | 15.7 | 46    | Negatif Q493R         | Pos  |
| 16 | SNP017 | Omicron BA.5.2.1 | Laki-laki | 20.1 | 64    | Negatif Q493R         | Pos  |
| 17 | SNP018 | Omicron BA.5     | Perempuan | 26.8 | 1     | Negatif Q493R         | Pos  |
| 18 | SNP019 | Omicron BA.5.1   | Perempuan | 28.1 | 25    | Negatif Q493R         | Pos  |
| 19 | SNP020 | Omicron BA.5.2   | Laki-laki | 29.2 | 2     | Negatif Q493R         | Pos  |
| 20 | SNP021 | Omicron BA.5.2.1 | Laki-laki | 16.1 | 2     | Negatif Q493R         | Pos  |
| 21 | SNP022 | Omicron BA.5.2.1 | Perempuan | 20.0 | 55    | Negatif Q493R         | Pos  |
| 22 | SNP023 | Omicron BA.5.2   | Perempuan | 17.3 | 58    | Negatif Q493R         | Pos  |
| 23 | SNP024 | Omicron BA.5.2   | Perempuan | 17.7 | 12    | Negatif Q493R         | Pos  |
| 24 | SNP025 | Omicron BA.5.2   | Perempuan | 24.6 | 41    | Negatif Q493R         | Pos  |
| 25 | SNP026 | Omicron BA.5.2   | Perempuan | 26.8 | 47    | Negatif Q493R         | Pos  |
| 26 | SNP027 | Omicron BA.5.2.3 | Perempuan | 26.8 | 23    | Negatif Q493R         | Pos  |
| 27 | SNP028 | Omicron BA.5.2   | Perempuan | 28   | 23    | Negatif Q493R         | Pos  |
| 28 | SNP029 | Omicron BA.5.2   | Laki-laki | 28.6 | 31    | Negatif Q493R         | Pos  |
| 29 | SNP030 | Omicron BA.5.2   | Perempuan | 29.4 | 23    | Negatif Q493R         | Pos  |
| 30 | SNP031 | Omicron BA.5.2   | Perempuan | 22.2 | 26    | Negatif Q493R         | Pos  |
| 31 | SNP032 | Omicron BA.5.2.1 | Perempuan | 19.9 | 23    | Negatif Q493R         | Pos  |
| 32 | SNP036 | Omicron BA.5     | Laki-laki | 21.8 | 2 bln | Negatif Q493R         | Pos  |
| 33 | SNP037 | Omicron BA.5     | Perempuan | 28.2 | 2     | Negatif Q493R         | Pos  |
| 34 | SNP040 | Omicron BA.5     | Laki-laki | 24.5 | 17    | Negatif Q493R         | Pos  |
| 35 | SNP041 | Omicron BA.5     | Perempuan | 26.7 | 55    | Negatif Q493R         | Pos  |
| 36 | SNP043 | Omicron BA.5     | Perempuan | 14.8 | 68    | Negatif Q493R         | Pos  |
| 37 | SNP044 | Omicron BA.5     | Perempuan | 17.1 | 15    | Negatif Q493R         | Pos  |
| 38 | SNP047 | Omicron BA.5     | Perempuan | 29.4 | 48    | Negatif Q493R         | Pos  |
| 39 | SNP048 | Omicron BA.5     | Laki-laki | 15.1 | 38    | Negatif Q493R         | Pos  |
| 40 | SNP051 | Omicron BA.5     | Perempuan | 25.6 | 10    | Negatif Q493R         | Pos  |
| 41 | SNP052 | Omicron BA.5     | Laki-laki | 27,9 | 43    | Negatif Q493R         | Pos  |
| 42 | SNP053 | Omicron BA.5     | Perempuan | 28.2 | 47    | Negatif Q493R         | Pos  |
| 43 | SNP054 | Omicron BA.5     | Perempuan | 29   | 8     | Negatif Q493R         | Pos  |
| 44 | SNP055 | Omicron BA.5     | Perempuan | 20   | 28    | Negatif Q493R         | Pos  |
| 45 | SNP057 | Omicron BA.5     | Perempuan | 25.5 | 33    | Negatif Q493R         | Pos  |
| 46 | SNP058 | Omicron BA.5     | Perempuan | 27.2 | 51    | Negatif Q493R         | Pos  |

|    |        |                  |           |      |       |               |     |
|----|--------|------------------|-----------|------|-------|---------------|-----|
| 47 | SNP059 | Omicron BA.5     | Perempuan | 27.7 | 24    | Negatif Q493R | Pos |
| 48 | SNP060 | Omicron BA.5     | Laki-laki | 29.2 | 6     | Negatif Q493R | Pos |
| 49 | SNP061 | Omicron BA.5     | Perempuan | 29.4 | 43    | Negatif Q493R | Pos |
| 50 | SNP062 | Omicron BA.5     | Laki-laki | 29.5 | 37    | Negatif Q493R | Pos |
| 51 | SNP063 | Omicron BA.5     | Laki-laki | 29.6 | 32    | Negatif Q493R | Pos |
| 52 | SNP064 | Omicron BA.5     | Laki-laki | 27.3 | 24    | Negatif Q493R | Pos |
| 53 | SNP065 | Omicron BA.5     | Perempuan | 16.1 | 56    | Negatif Q493R | Pos |
| 54 | SNP067 | Omicron BA.5     | Laki-laki | 20.7 | 16    | Negatif Q493R | Pos |
| 55 | SNP068 | Omicron BA.5     | Perempuan | 25.3 | 36    | Negatif Q493R | Pos |
| 56 | SNP069 | Omicron BA.5     | Laki-laki | 26.0 | 19    | Negatif Q493R | Pos |
| 57 | SNP071 | Omicron BA.5     | Perempuan | 28.6 | 42    | Negatif Q493R | Pos |
| 58 | SNP072 | Omicron BA.5     | Perempuan | 27.2 | 30    | Negatif Q493R | Pos |
| 59 | SNP073 | Omicron BA.5     | Perempuan | 28.7 | 30    | Negatif Q493R | Pos |
| 60 | SNP076 | Omicron BA.5     | Laki-laki | 25.6 | 68    | Negatif Q493R | Pos |
| 61 | SNP077 | Omicron BA.5     | Laki-laki | 17.9 | 31    | Negatif Q493R | Pos |
| 62 | SNP078 | Omicron BA.5     | Perempuan | 18.7 | 21    | Negatif Q493R | Pos |
| 63 | SNP079 | Omicron BA.5     | Perempuan | 23.8 | 21    | Negatif Q493R | Pos |
| 64 | SNP080 | Omicron BA.5     | Perempuan | 19.1 | 25    | Negatif Q493R | Pos |
| 65 | SNP081 | Omicron BA.5     | Laki-laki | 28.3 | 24    | Negatif Q493R | Pos |
| 66 | SNP082 | Omicron BA.5     | Perempuan | 20.3 | 38    | Negatif Q493R | Pos |
| 67 | SNP083 | Omicron BA.5     | Laki-laki | 14.7 | 74    | Negatif Q493R | Pos |
| 68 | SNP084 | Omicron BA.5     | Laki-laki | 16.5 | 5 bln | Negatif Q493R | Pos |
| 69 | SNP088 | Omicron BA.5.2   | Laki-laki | 28.2 | 23    | Negatif Q493R | Pos |
| 70 | SNP089 | Omicron BA.5     | Perempuan | 17.1 | 25    | Negatif Q493R | Pos |
| 71 | SNP090 | Omicron BA.5.2   | Laki-laki | 26.6 | 22    | Negatif Q493R | Pos |
| 72 | SNP091 | Omicron BA.5.2   | Laki-laki | 24.1 | 39    | Negatif Q493R | Pos |
| 73 | SNP092 | Omicron BA.5     | Laki-laki | 18.6 | 27    | Negatif Q493R | Pos |
| 74 | SNP094 | Omicron BA.5.2   | Laki-laki | 22.1 | 13    | Negatif Q493R | Pos |
| 75 | SNP095 | Omicron BA.5.2   | Perempuan | 12.1 | 24    | Negatif Q493R | Pos |
| 76 | SNP096 | Omicron BA.5.2   | Laki-laki | 15.8 | 28    | Negatif Q493R | Pos |
| 77 | SNP097 | Omicron BA.5.2   | Perempuan | 23.9 | 24    | Negatif Q493R | Pos |
| 78 | SNP098 | Omicron BA.5.2   | Laki-laki | 26.3 | 31    | Negatif Q493R | Pos |
| 79 | SNP099 | Omicron BA.5.2   | Perempuan | 25.7 | 38    | Negatif Q493R | Pos |
| 80 | SNP100 | Omicron BA.5.1   | Laki-laki | 20.2 | 15    | Negatif Q493R | Pos |
| 81 | SNP101 | Omicron BA.5.2   | Perempuan | 23.6 | 16    | Negatif Q493R | Pos |
| 82 | SNP102 | Omicron BA.5.2   | Perempuan | 25.5 | 62    | Negatif Q493R | Pos |
| 83 | SNP103 | Omicron BA.5.2   | Laki-laki | 29.3 | 30    | Negatif Q493R | Pos |
| 84 | SNP104 | Omicron BA.5.2   | Perempuan | 21.1 | 67    | Negatif Q493R | Pos |
| 85 | SNP105 | Omicron BA.5.2   | Laki-laki | 21   | 22    | Negatif Q493R | Pos |
| 86 | SNP106 | Omicron BA.5.6   | Perempuan | 21.9 | 31    | Negatif Q493R | Pos |
| 87 | SNP108 | Omicron BA.5.2   | Perempuan | 22.1 | 44    | Negatif Q493R | Pos |
| 88 | SNP109 | Omicron BA.5.2   | Perempuan | 22.2 | 21    | Negatif Q493R | Pos |
| 89 | SNP111 | Omicron BA.5.2   | Perempuan | 17.2 | 6 bln | Negatif Q493R | Pos |
| 90 | SNP113 | Omicron BA.5.2   | Laki-laki | 21.4 | 34    | Negatif Q493R | Pos |
| 91 | SNP114 | Omicron BA.5.2   | Perempuan | 14.4 | 60    | Negatif Q493R | Pos |
| 92 | SNP115 | Omicron BA.5.2.1 | Perempuan | 20.6 | 26    | Negatif Q493R | Pos |
| 93 | SNP116 | Omicron BA.5.2.1 | Perempuan | 15.4 | 23    | Negatif Q493R | Pos |

|     |        |                  |           |       |    |               |     |
|-----|--------|------------------|-----------|-------|----|---------------|-----|
| 94  | SNP117 | Omicron BA.5.2   | Perempuan | 18.1  | 64 | Negatif Q493R | Pos |
| 95  | SNP118 | Omicron BA.5.2   | Laki-laki | 24.2  | 45 | Negatif Q493R | Pos |
| 96  | SNP119 | Omicron BA.5.2   | Perempuan | 28.9  | 29 | Negatif Q493R | Pos |
| 97  | SNP120 | Omicron BA.5.2   | Perempuan | 12.6  | 19 | Negatif Q493R | Pos |
| 98  | SNP121 | Omicron BA.5.2.1 | Laki-laki | 11.4  | 21 | Negatif Q493R | Pos |
| 99  | SNP122 | Omicron BA.5.2   | Perempuan | 13,8  | 18 | Negatif Q493R | Pos |
| 100 | SNP123 | Omicron BA.5.2   | Perempuan | 19.3  | 18 | Negatif Q493R | Pos |
| 101 | SNP124 | Omicron BA.5.2   | Perempuan | 17.4  | 41 | Negatif Q493R | Pos |
| 102 | SNP125 | Omicron BA.5.2   | Perempuan | 22.5  | 15 | Negatif Q493R | Pos |
| 103 | SNP126 | Omicron BA.5.2   | Perempuan | 28.5  | 42 | Negatif Q493R | Pos |
| 104 | SNP127 | Omicron BA.5.2.1 | Perempuan | 23.2  | 27 | Negatif Q493R | Pos |
| 105 | SNP128 | Omicron BA.5.2   | Perempuan | 27.7  | 22 | Negatif Q493R | Pos |
| 106 | SNP129 | Omicron BA.5.2   | Perempuan | 26.2  | 27 | Negatif Q493R | Pos |
| 107 | SNP131 | Omicron BA.5.2   | Perempuan | 27.6  | 8  | Negatif Q493R | Pos |
| 108 | SNP132 | Omicron BA.5     | Laki-laki | 17.0  | 56 | Negatif Q493R | Pos |
| 109 | SNP133 | Omicron BA.5.2   | Perempuan | 28.2  | 48 | Negatif Q493R | Pos |
| 110 | SNP135 | Omicron BA.5.2   | Perempuan | 17.1  | 10 | Negatif Q493R | Pos |
| 111 | SNP136 | Omicron BA.5.2.5 | Laki-laki | 22.3  | 29 | Negatif Q493R | Pos |
| 112 | SNP137 | Omicron BA.5.2   | Laki-laki | 23    | 20 | Negatif Q493R | Pos |
| 113 | SNP138 | Omicron BA.5.2   | Laki-laki | 25.2  | 21 | Negatif Q493R | Pos |
| 114 | SNP139 | Omicron BA.5.2   | Laki-laki | 21.0  | 19 | Negatif Q493R | Pos |
| 115 | SNP140 | Omicron BA.5.2   | Laki-laki | 25.6  | 20 | Negatif Q493R | Pos |
| 116 | SNP141 | Omicron BA.5.2   | Laki-laki | 28.3  | 21 | Negatif Q493R | Pos |
| 117 | SNP142 | Omicron BA.5.2.1 | Laki-laki | 26.4  | 19 | Negatif Q493R | Pos |
| 118 | SNP03  | Omicron BA.4     | Perempuan | 21.2  | 52 | Negatif Q493R | Neg |
| 119 | SNP066 | Omicron BA.4     | Laki-laki | 19.7  | 41 | Negatif Q493R | Pos |
| 120 | SNP143 | Omicron BA.1     | Perempuan | 19.09 | 26 | Positif Q493R | Pos |
| 121 | SNP144 | Omicron BA.1     | Laki-laki | 18.03 | 38 | Positif Q493R | Pos |
| 122 | SNP145 | Omicron BA.1     | Perempuan | 17.3  | 44 | Positif Q493R | Pos |
| 123 | SNP146 | Omicron BA.1     | Perempuan | 11.5  | 55 | Positif Q493R | Pos |
| 124 | SNP147 | Omicron BA.1     | Laki-laki | 25.47 | 32 | Positif Q493R | Pos |
| 125 | SNP148 | Omicron BA.1     | Laki-laki | 10.8  | 41 | Positif Q493R | Pos |
| 126 | SNP149 | Omicron BA.1     | Perempuan | 12.5  | 35 | Positif Q493R | Pos |
| 127 | SNP150 | Omicron BA.1     | Laki-laki | 10.4  | 51 | Positif Q493R | Pos |
| 128 | SNP151 | Omicron BA.1     | Laki-laki | 24.8  | 29 | Positif Q493R | Pos |
| 129 | SNP152 | Omicron BA.1     | Perempuan | 28.11 | 52 | Positif Q493R | Neg |
| 130 | SNP153 | Omicron BA.2     | Perempuan | 13.30 | 27 | Positif Q493R | Neg |
| 131 | SNP154 | Omicron BA.2     | Laki-laki | 28.35 | 23 | Positif Q493R | Neg |
| 132 | SNP155 | Omicron BA.2     | Laki-laki | 19.14 | 48 | Positif Q493R | Neg |
| 133 | SNP156 | Omicron BA.2     | Laki-laki | 11.68 | 31 | Positif Q493R | Neg |
| 134 | SNP157 | Omicron BA.2     | Laki-laki | 10.09 | 20 | Positif Q493R | Neg |
| 135 | SNP158 | Omicron BA.2     | Laki-laki | 8.94  | 23 | Positif Q493R | Neg |
| 136 | SNP159 | Omicron BA.2     | Perempuan | 25.17 | 52 | Positif Q493R | Neg |
| 137 | SNP160 | Omicron BA.2     | Laki-laki | 26.7  | 64 | Positif Q493R | Neg |
| 138 | SNP161 | Omicron BA.2     | Perempuan | 22.03 | 58 | Positif Q493R | Neg |
| 139 | SNP162 | Omicron BA.2     | Perempuan | 27.98 | 41 | Positif Q493R | Neg |
| 140 | SNP038 | Omicron BA.2     | Laki-laki | 21.2  | 23 | Positif Q493R | Neg |



[illegible]
