# Supplementary material for: The Single-Nucleotide Polymorphism (SNP) Validity to Detect Omicron Variants
Source: Adv Virol. 2023 Sep 7;2023:6618710. doi: 10.1155/2023/6618710 (PMC10501844; doi:10.1155/2023/6618710)
Supplement: Supplementary Materials — All whole genome sequencing and single-nucleotide polymorphism data from patients. [file 6618710.f1.zip]

Archive with 2 entries (2 files):
- Ethical Approval Luhung Budiailmiawan, dr., SpPK(K).pdf
- Research Data.pdf
